# Supplementary material
Source: PubMed Central journal article supplement (PMC6399617)
Supplement: EMBR-20-e46451-s006.pdf [file EMBR-20-e46451-s006.pdf]

**Figure 3**

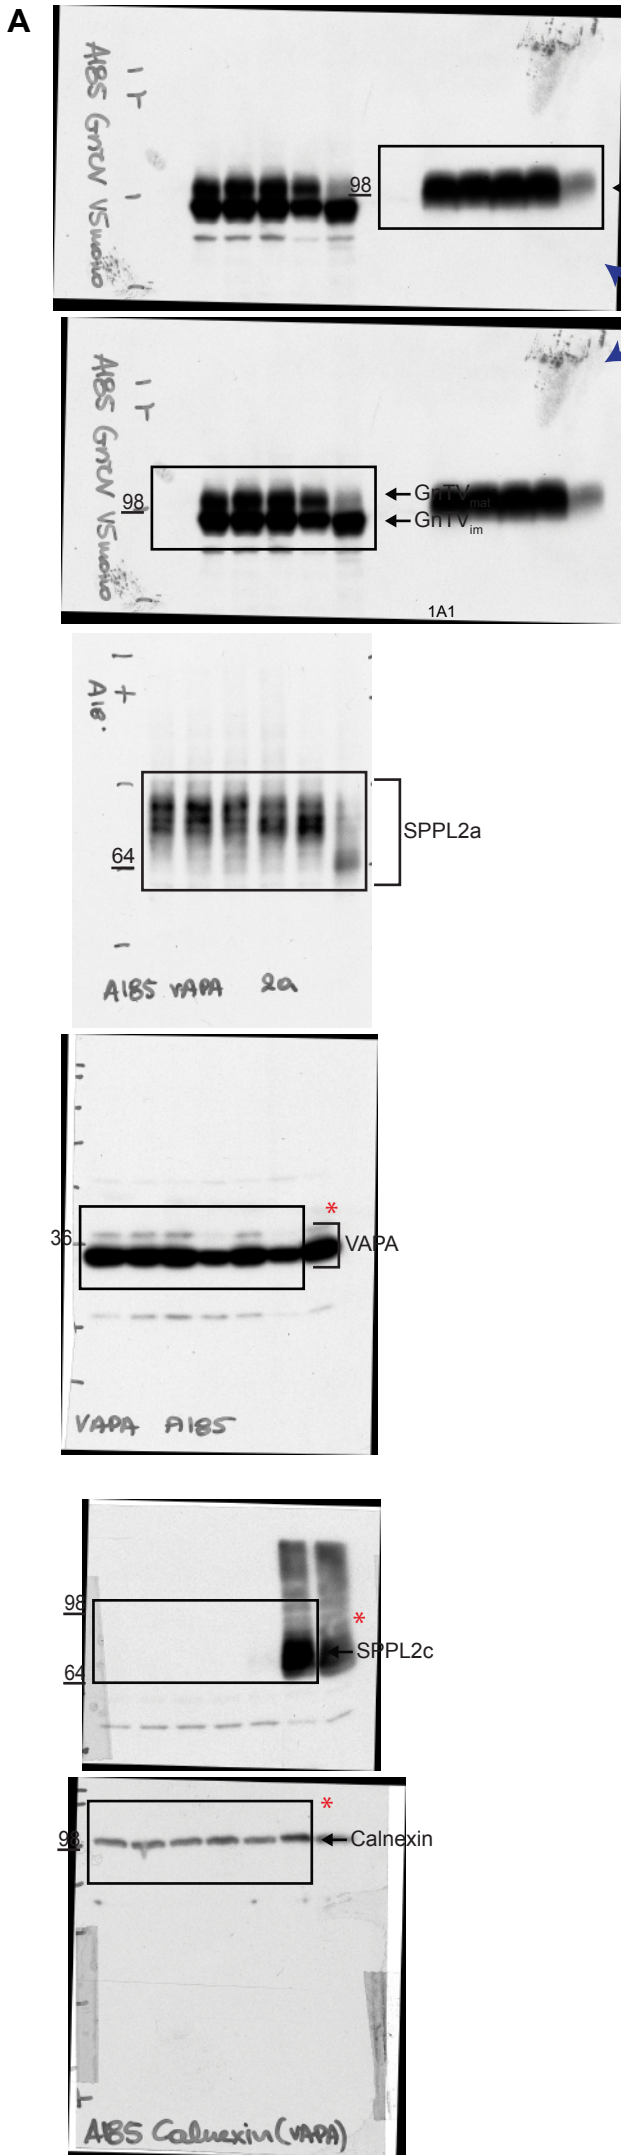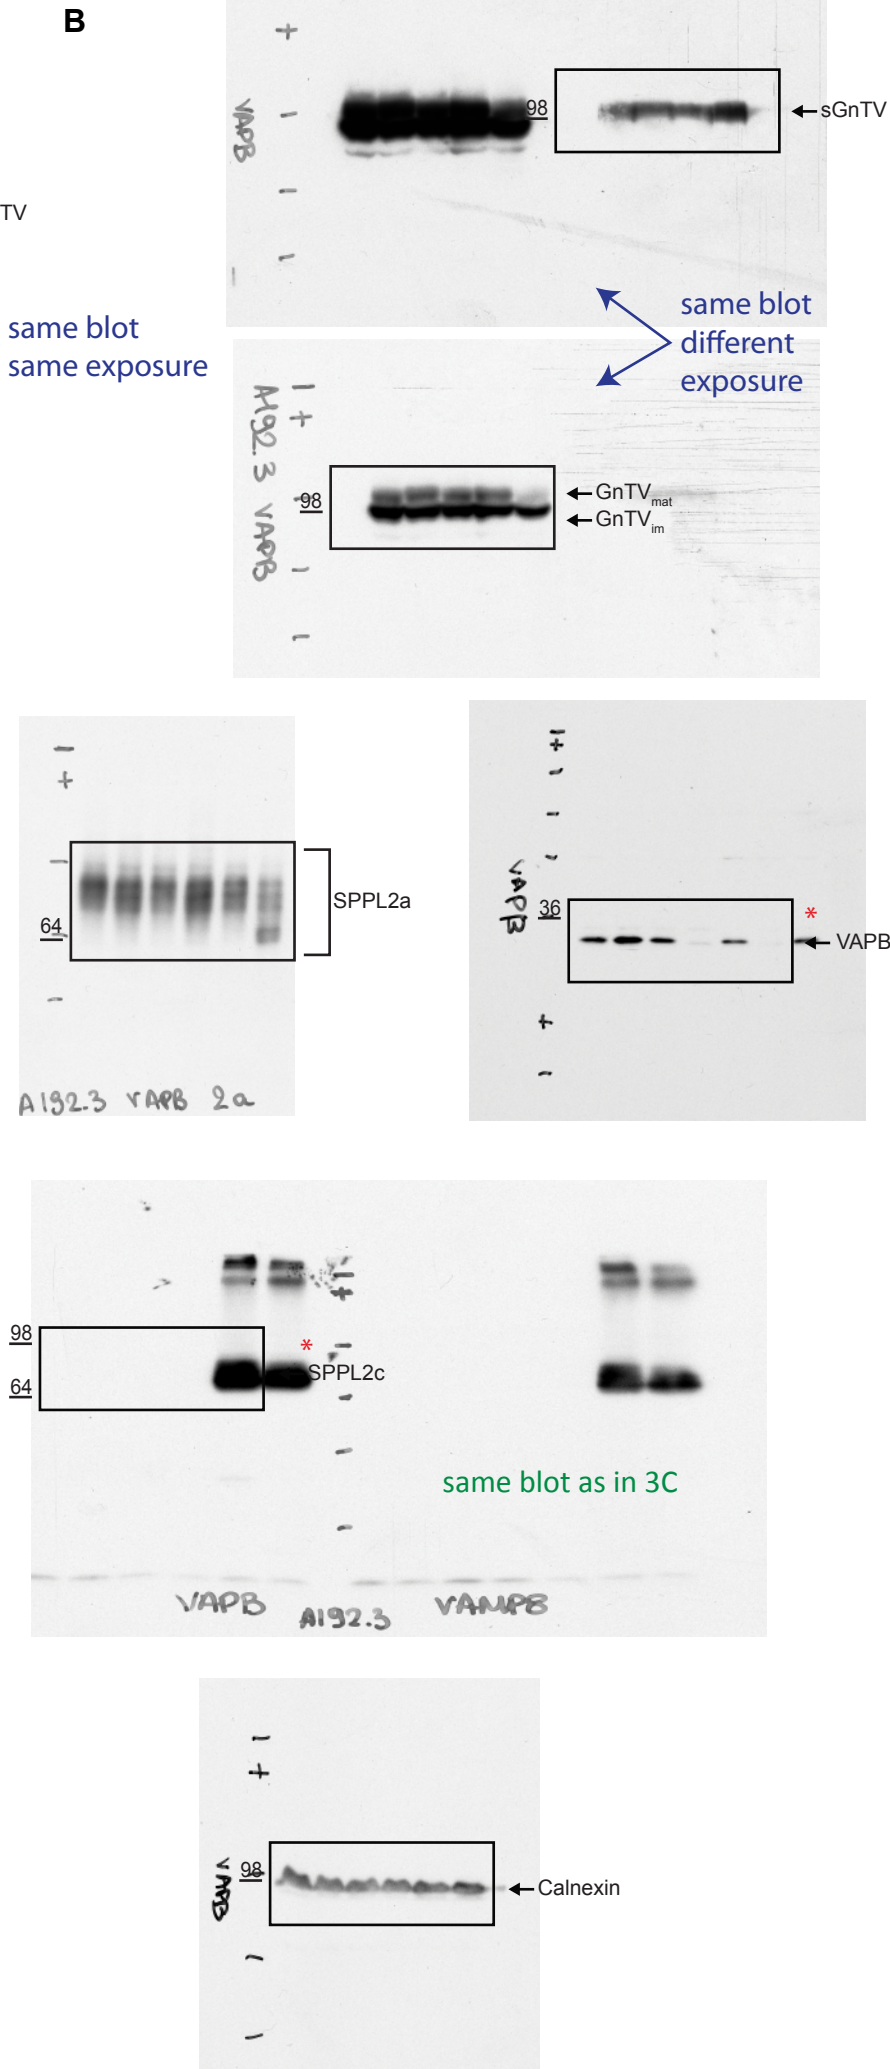

\*SPPL2c D/A expression



Figure 3

C

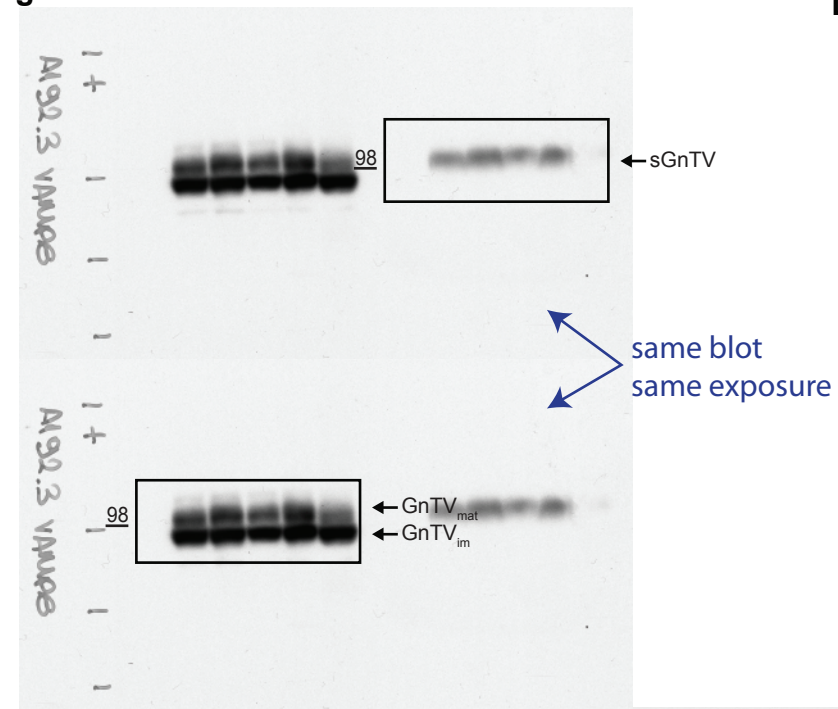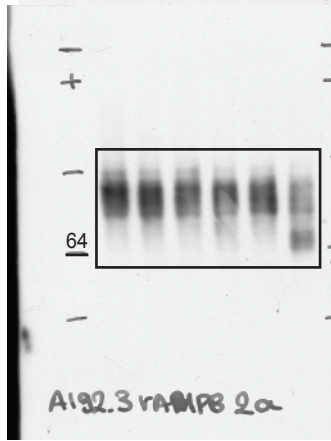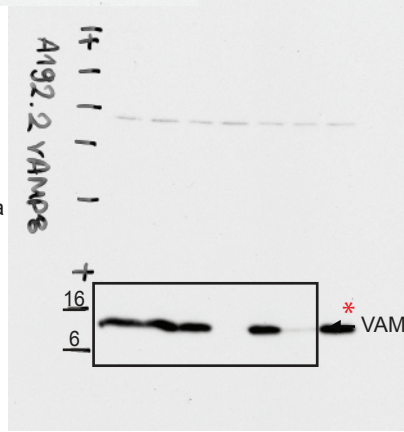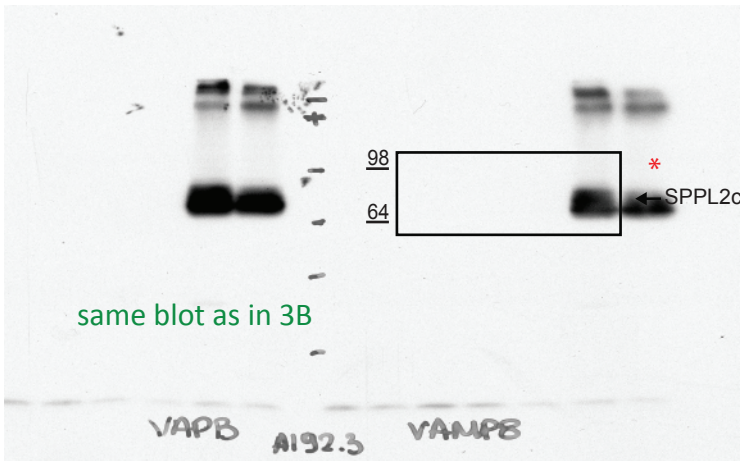

D

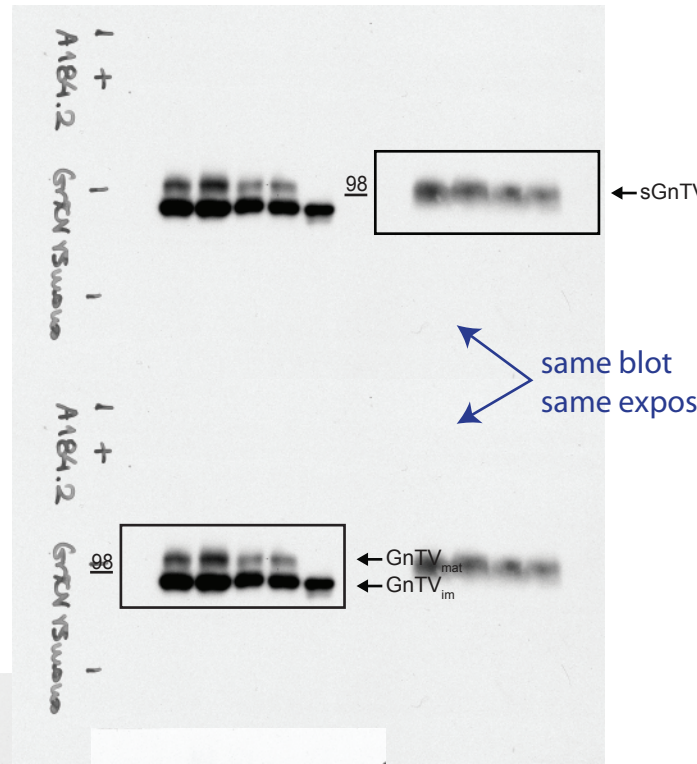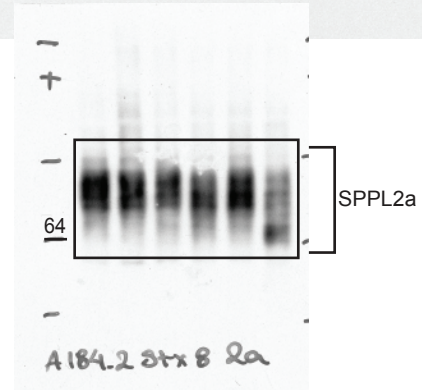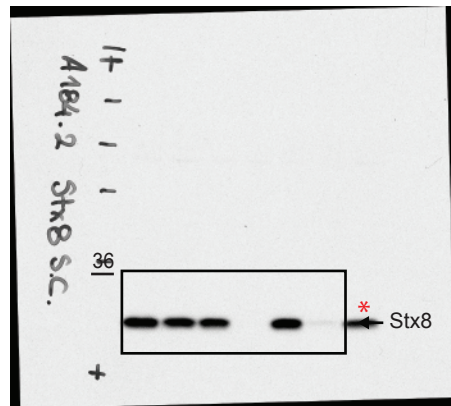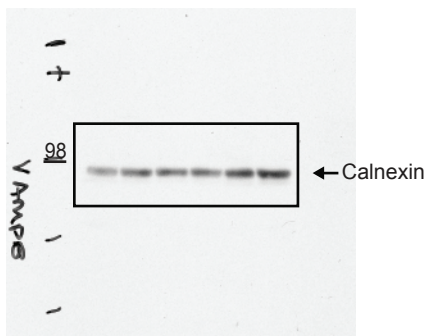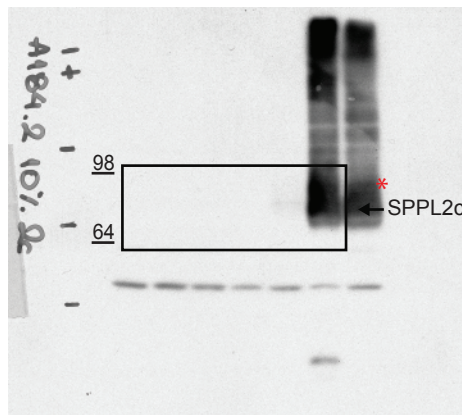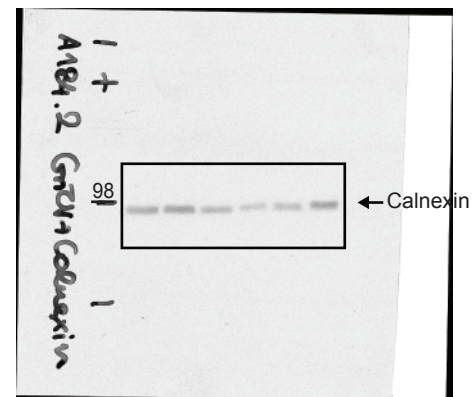

\*SPPL2c D/A expression



**Figure 3**

GnTV - VS mono 30' 1st film

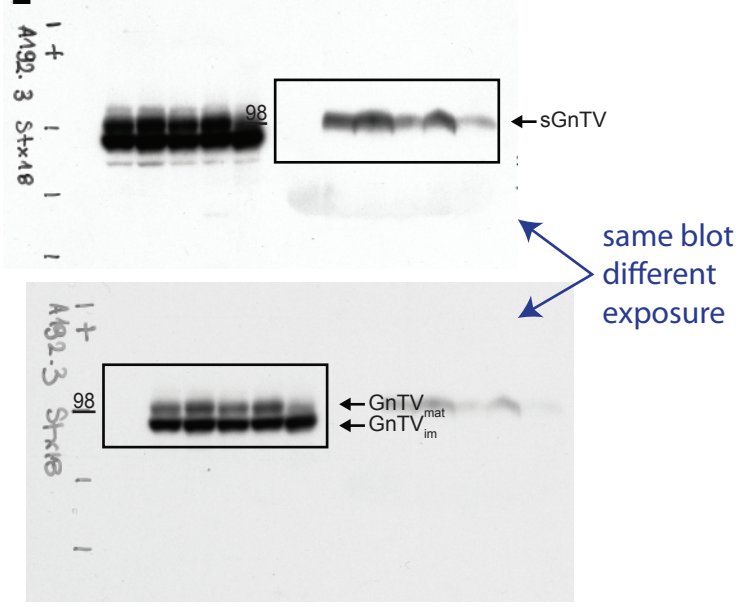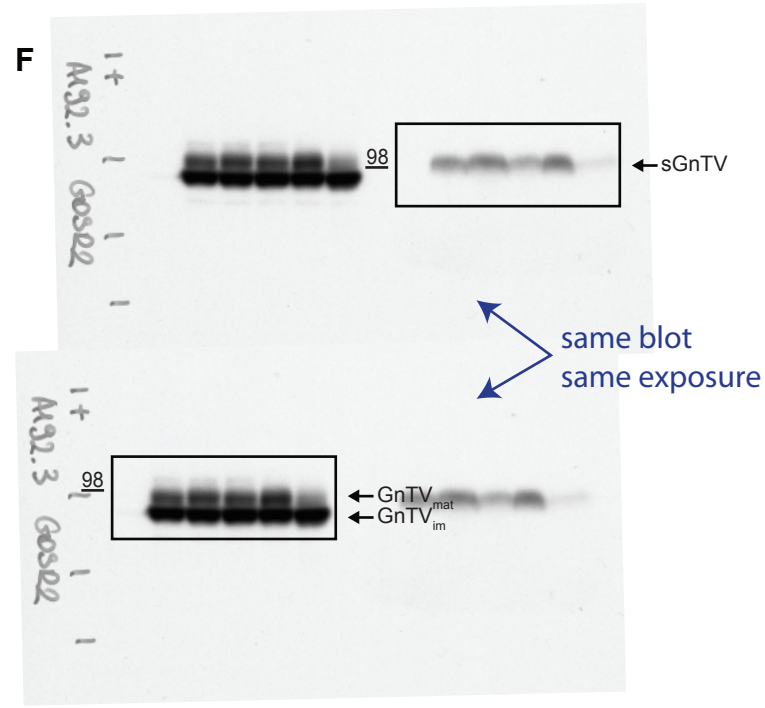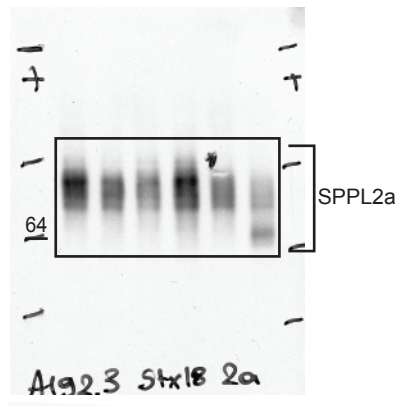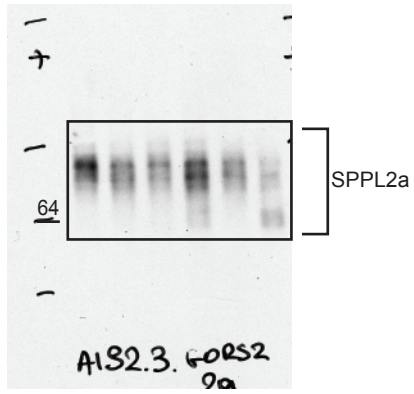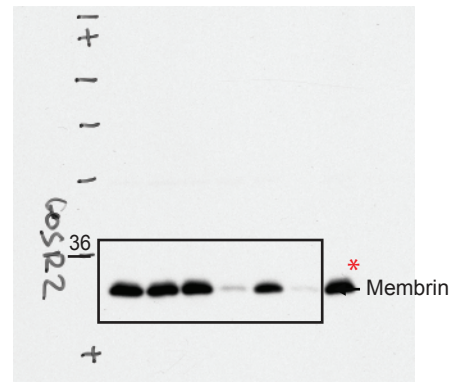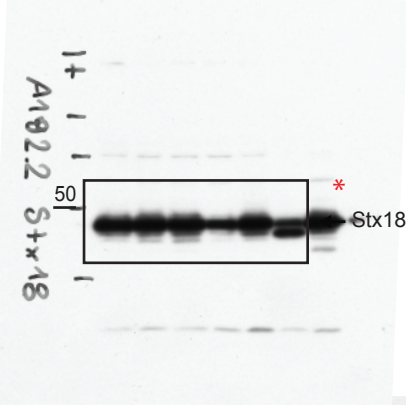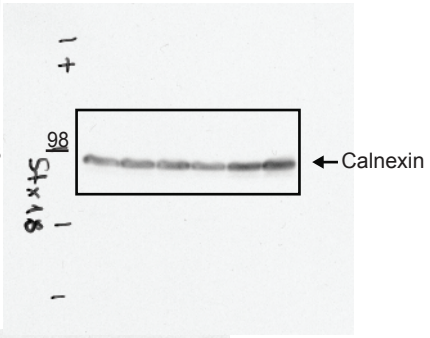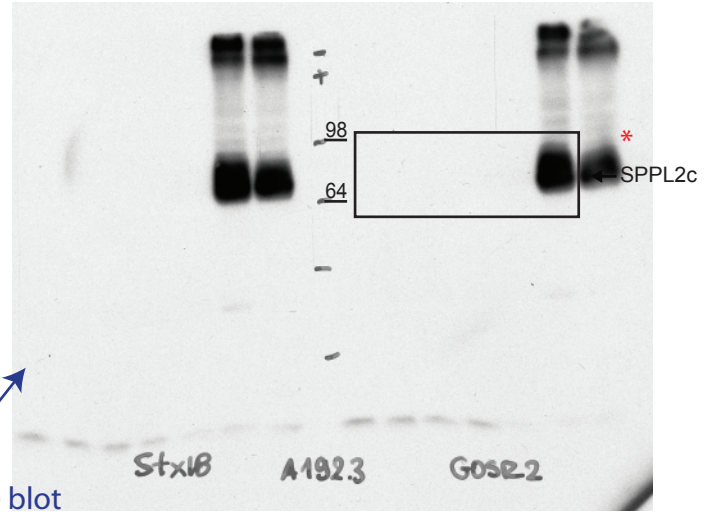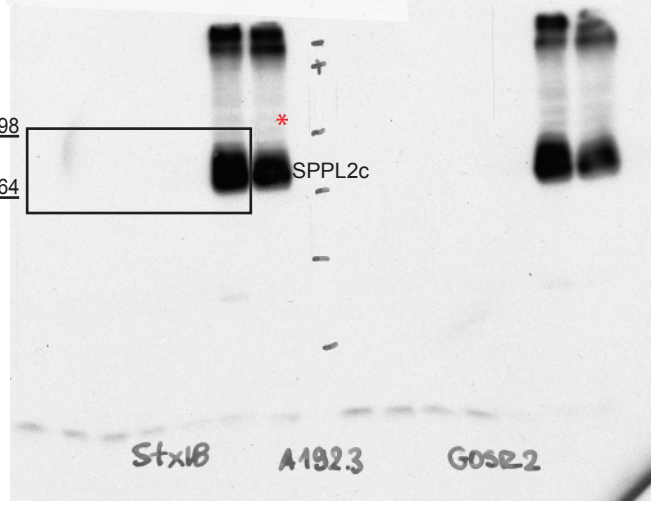

same blot  
same exposure

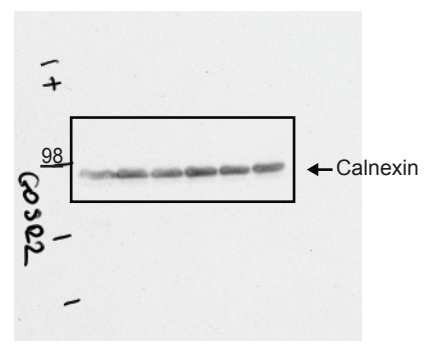

\*SPPL2c D/A expression
