# Supplementary material
Source: PubMed Central journal article supplement (PMC6399617)

Figure 1

C

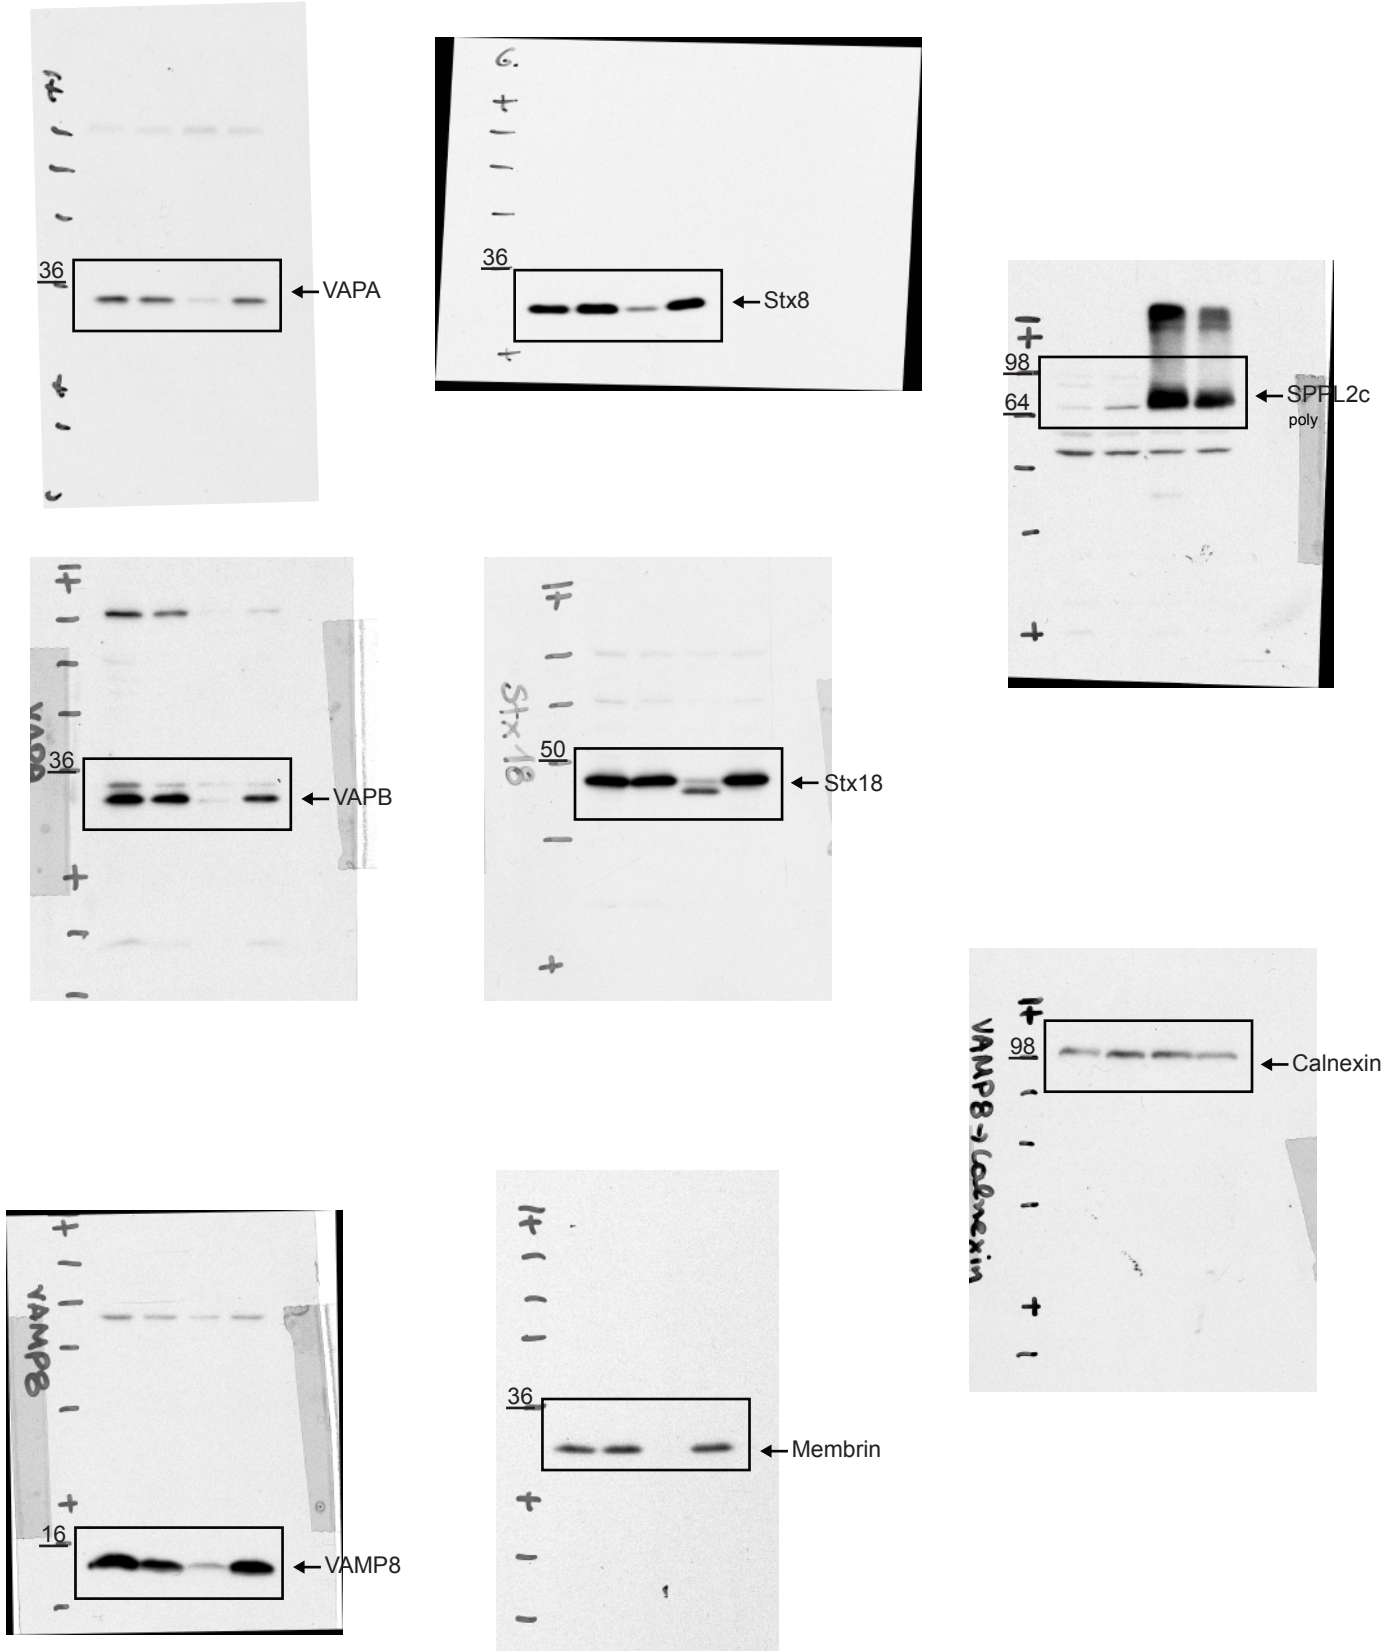

Supplement: EMBR-20-e46451-s004.pdf [file EMBR-20-e46451-s004.pdf]

Figure 2

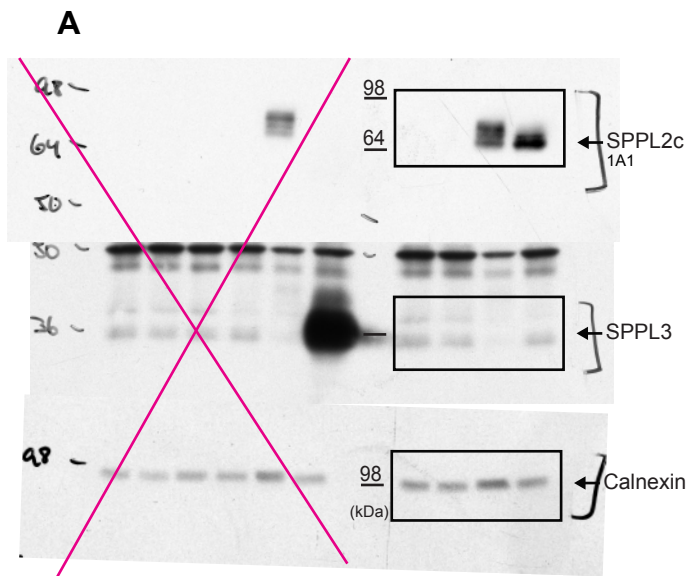

**Figure 2**

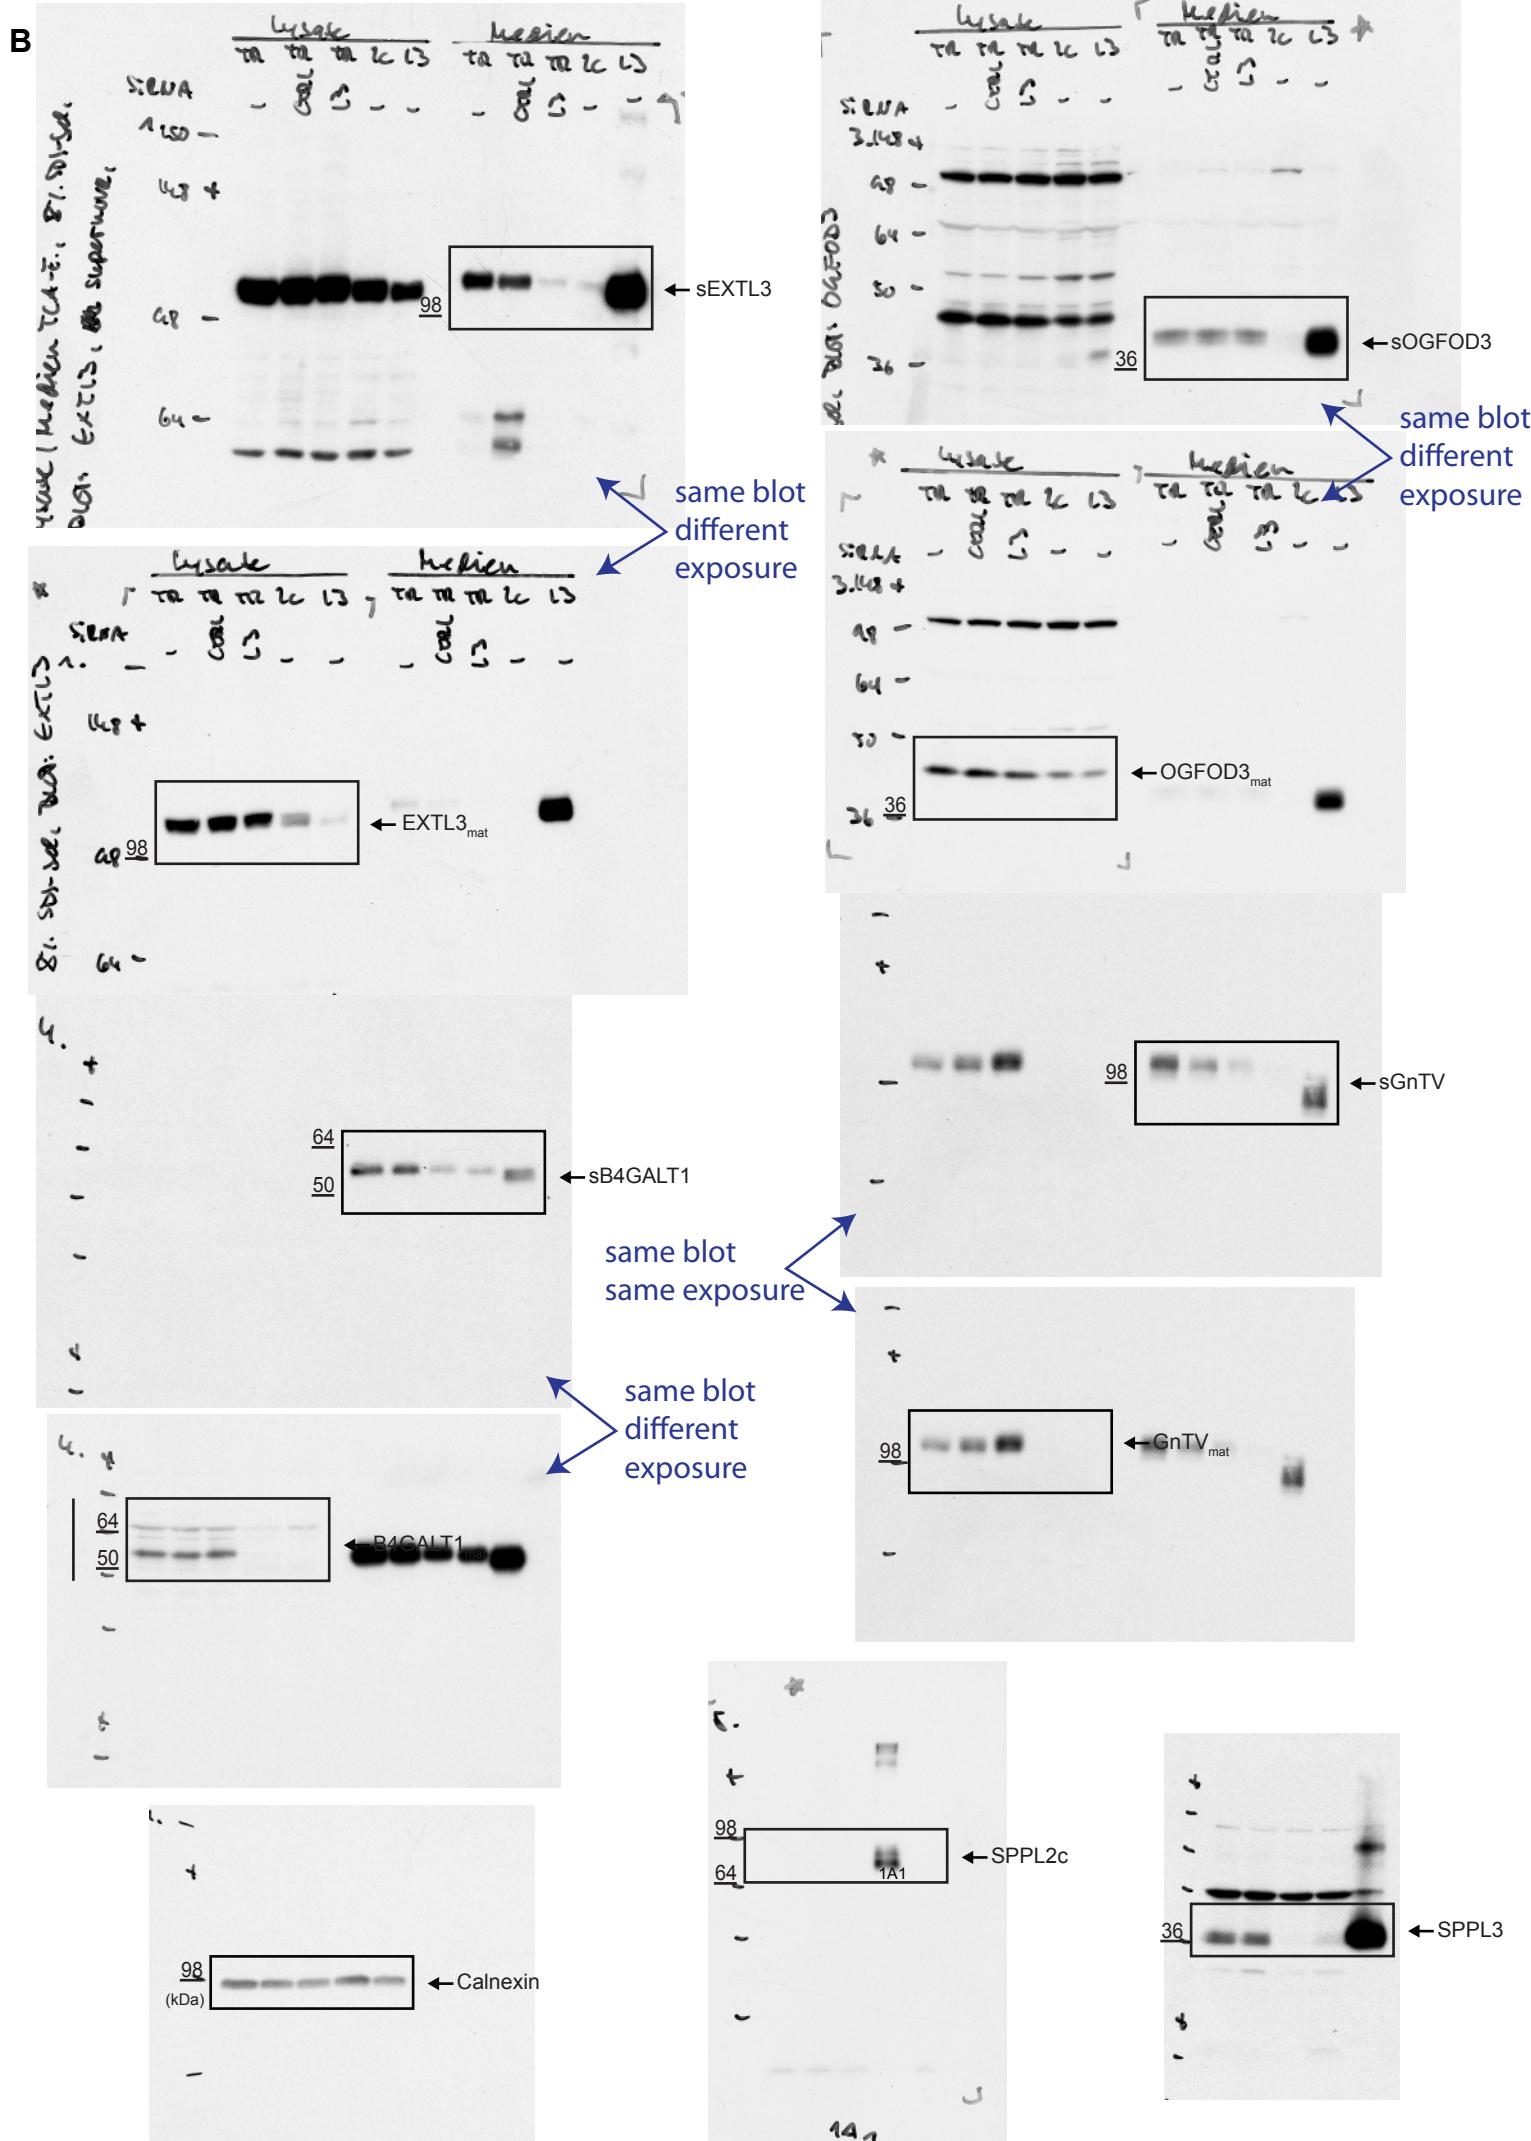

Figure 2

C

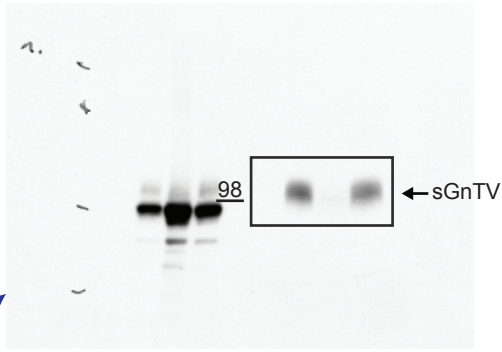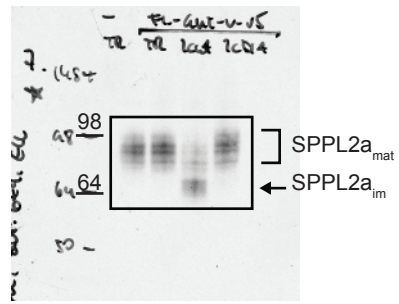

same blot  
same exposure

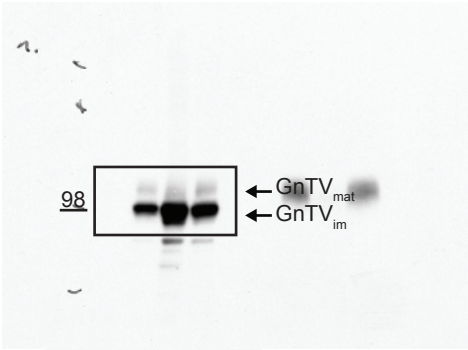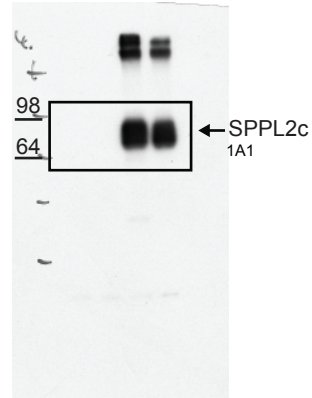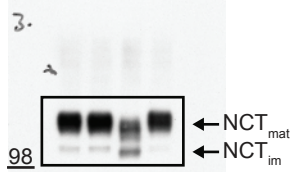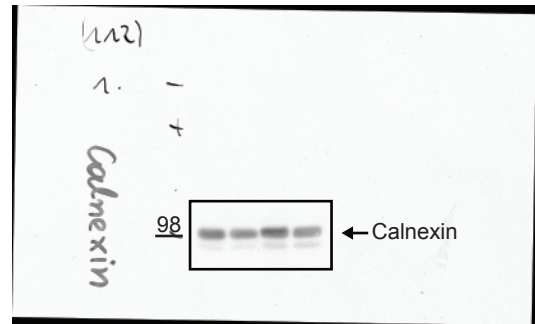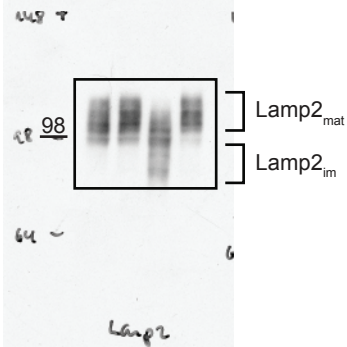

Supplement: EMBR-20-e46451-s005.pdf [file EMBR-20-e46451-s005.pdf]
